# 1 Early Evidence of Effectiveness of Digital Contact

## 2 Tracing for SARS-CoV-2 in Switzerland

3  
4 Marcel Salathé, Christian L. Althaus, Nanina Anderegg, Daniele Antonioli, Tala Ballouz,  
5 Edouard Bugnion, Srdjan Čapkun, Dennis Jackson, Sang-Il Kim, James R. Larus, Nicola  
6 Low, Wouter Lueks, Dominik Menges, Cédric Moullet, Mathias Payer, Julien Riou, Theresa  
7 Stadler, Carmela Troncoso, Effy Vayena, Viktor von Wyl

8  
9  
10 All authors contributed equally.

11 Correspondence: [marcel.salathe@epfl.ch](mailto:marcel.salathe@epfl.ch), [viktor.vonwyl@uzh.ch](mailto:viktor.vonwyl@uzh.ch)

### 12 13 14 **Affiliations:**

15 *MS: Digital Epidemiology Lab, Global Health Institute, School of Life Sciences, EPFL, Geneva,*  
16 *Switzerland*

17 *CA: Institute of Social and Preventive Medicine, University of Bern, Bern, Switzerland; Interfaculty*  
18 *Platform for Data and Computational Science (INPUT), University of Bern, Bern, Switzerland.*

19 *NA, JR: Institute of Social and Preventive Medicine, University of Bern, Bern, Switzerland; Division of*  
20 *infectious diseases, Federal Office of Public Health, Liebefeld, Switzerland*

21 *DA, EB, JRL, WL, MP, TS, CT, MS: School of Computer and Communication Sciences, EPFL, Switzerland*

22 *S-IK: Federal Office of Public Health, Liebefeld, Switzerland*

23 *SC, DJ: Department of Computer Science, ETH Zurich, Switzerland*

24 NL: *Institute of Social and Preventive Medicine, University of Bern, Bern, Switzerland*

25 VW: *Digital and Mobile Health Group, Epidemiology, Biostatistics & Prevention Institute, University of*  
26 *Zurich, Zurich, Switzerland*

27 TB, DM: *Epidemiology, Biostatistics & Prevention Institute, University of Zurich, Zurich, Switzerland*

28 EV: *Department of Health Sciences and Technology, Health Ethics and Policy Laboratory, ETH Zurich,*  
29 *Switzerland*

30 CM: *Federal Office of Information Technology, Systems and Telecommunication, Bern, Switzerland*

31

32

33 **In the wake of the pandemic of coronavirus disease 2019 (COVID-19), contact tracing has**  
34 **become a key element of strategies to control the spread of severe acute respiratory**  
35 **syndrome coronavirus 2019 (SARS-CoV-2). Given the rapid and intense spread of SARS-**  
36 **CoV-2, digital contact tracing has emerged as a potential complementary tool to support**  
37 **containment and mitigation efforts. Early modelling studies highlighted the potential of**  
38 **digital contact tracing to break transmission chains, and Google and Apple subsequently**  
39 **developed the Exposure Notification (EN) framework, making it available to the vast**  
40 **majority of smartphones. A growing number of governments have launched or**  
41 **announced EN-based contact tracing apps, but their effectiveness remains unknown.**  
42 **Here, we report early findings of the digital contact tracing app deployment in**  
43 **Switzerland. We demonstrate proof-of-principle that digital contact tracing reaches**  
44 **exposed contacts, who then test positive for SARS-CoV-2. This indicates that digital**  
45 **contact tracing is an effective complementary tool for controlling the spread of SARS-**  
46 **CoV-2. Continued technical improvement and international compatibility can further**  
47 **increase the efficacy, particularly also across country borders.**

48 Contact tracing is a key element of the response to the pandemic of coronavirus disease  
49 2019 (COVID-19), caused by severe acute respiratory syndrome coronavirus 2019 (SARS-  
50 CoV-2). By August 30, 2020, nearly 25 million diagnosed cases and over 800,000 confirmed  
51 deaths had been recorded [1]. Contact tracing is part of a strategy of “test, trace, isolate  
52 and quarantine” (TTIQ), which aims to stop recently infected individuals from transmitting  
53 SARS-CoV-2 [2]. The capacity for transmission before the onset of symptoms and the short  
54 incubation period mean that contact tracing has to be fast to be effective [3,4]. While  
55 modelling results showed that rapid, digital contact tracing could be a critical tool for  
56 containment and mitigation efforts [5], early efforts to develop and deploy digital  
57 applications were hampered by critical limitations imposed by smartphone operating  
58 systems and concerns about confidentiality and data protection. The Exposure Notification  
59 (EN) framework, jointly developed by Google and Apple, addressed these limitations and  
60 enabled the implementation of digital contact tracing applications (apps) in which all  
61 proximity contact information, and any decision-making about whether or not to notify a  
62 user of an exposure, remain on a user’s device, rather than on the server of a central  
63 authority. This approach minimizes privacy risks [6], but the restriction of information to  
64 users’ devices means that data needed to evaluate the effectiveness of EN-based contact  
65 tracing apps have to be collected from different sources [7].

66

67 SwissCovid was the first EN-based contact tracing app launched by a governmental public  
68 health authority, initially as a pilot to a limited number of users, on May 25, 2020. On June  
69 25, 2020 the application was made available to the general population. A growing number  
70 of governments have launched or announced EN-based contact tracing apps, but their

71 effectiveness remains unknown. The significance of evaluating the effectiveness of EN-  
72 based contact tracing systems was highlighted by the World Health Organization [8] and is  
73 considered an ethical requirement for the continued deployment of such systems [9]. Here,  
74 we report early findings of the SwissCovid deployment from July 23, 2020 to August 31,  
75 2020 (hereafter referred to as the study period).

76

### 77 **How does SwissCovid work?**

78 The technical details of the SwissCovid system are given in [10], but briefly, SwissCovid uses  
79 the EN framework (version 1.2) to estimate proximity between phones. Each phone  
80 generates a daily Temporary Exposure Key (TEK), from which fast rotating proximity  
81 identifiers (RPI) are derived and exchanged with neighboring phones via Bluetooth Low  
82 Energy (BLE) beacons. Upon confirmation of SARS-CoV-2 infection by reverse  
83 transcriptase polymerase chain reaction (RT-PCR) testing, authorized Swiss health  
84 professionals can generate a single-use validation code (Covidcode), which is provided to  
85 the user. The Covidcode is associated with the beginning of the contagious period, which  
86 was determined to start 2 days before onset of symptoms [11] for symptomatic patients,  
87 and on the day of the test for patients who are asymptomatic at the time of testing. Upon  
88 entering a valid Covidcode in the app, TEKs for the contagious period are transmitted from  
89 the user's phone to the computer server of the Swiss Federal Office of Public Health (FOPH).  
90 All SwissCovid apps regularly contact the server for uploaded TEKs and associated data,  
91 and compute the exposure risk for the previous 10 days. To ensure privacy, notifications  
92 are shown only on the phone and are not forwarded to a server. During the study period,  
93 the notification provided users with the last day of exposure, a reminder that they are

94 entitled to a free RT-PCR test, and directed them to a SwissCovid-specific hotline (number  
95 only shown upon notification).

96

97 The BLE beacons, used by SwissCovid to estimate whether two devices have been in close  
98 proximity to each other for a period of time, are radio signals, which attenuate with  
99 distance. The EN framework application programming interface (API) estimates the amount  
100 of time a device has been close enough to other devices of infected individuals, based on  
101 three different attenuation intervals. To identify attenuation levels that would best  
102 estimate proximity below 1.5 meters, attenuation levels for different controlled and real-  
103 life scenarios produced by different devices at different distances and orientation were  
104 measured, and subsequently corrected using the per-device calibration values provided by  
105 the EN framework. Per-device calibration values take into account varying antenna and  
106 chip characteristics that influence sending and receiving powers. These results informed  
107 the parameterization of the EN framework so that SwissCovid users are notified if they  
108 spent at least 15 minutes in close proximity (1.5 meters) to RT-PCR-confirmed cases.

109

### 110 **Evaluation of privacy-preserving EN-based digital contact tracing**

111 Digital contract tracing is a new method, and it is therefore crucial to rapidly evaluate and  
112 continuously monitor its effectiveness in the field. Digital contact tracing apps aim to  
113 prevent secondary transmissions by warning exposed contacts as early as possible [7]. To  
114 be an effective intervention, several technical, behavioral and procedural conditions must  
115 be met [12] (Figure 1). The app must be used by both the infected index case and exposed  
116 contacts (Figure 1, row 1), the index case must enter the Covidcode following a positive RT-

117 PCR test (row 2), the exposed contacts must receive notifications (row 3), and the exposed  
118 contacts must respond to the warning in a timely fashion to prevent further transmission  
119 (rows 4 and 5). These conditions cannot be assessed directly via the app, due to the  
120 voluntary and decentralized nature of the system. Alternative indicators and data sources  
121 have therefore been developed or commissioned. In Switzerland, the Federal Statistical  
122 Office (FSO) monitors downloads and active use of SwissCovid and publicly releases the  
123 relevant number on a daily basis [13,14]. The FOPH updated the clinical registration form  
124 for RT-PCR-confirmed cases before the beginning of the study period, and included the  
125 SwissCovid app as an option for the reason for the test. In addition, several ongoing  
126 research studies collect information about app usage and notifications received on a  
127 monthly basis, e.g. Corona Immunitas [15], a nationwide Sars-CoV-2 seroprevalence study  
128 with digital follow-up surveys [16], and the COVID-19 Social Monitor  
129 (<https://csm.netlify.app>), a regular, longitudinal online-survey on social, economic, and  
130 behavioral aspects related to COVID-19, drawn from a representative panel for Switzerland.  
131 Furthermore, an ongoing cohort study embedded in contact tracing in the canton of Zurich  
132 [17], which enrolls RT-PCR-confirmed cases and their close contacts, investigates  
133 circumstances of transmissions and risk exposures to SARS-CoV-2, and collects data about  
134 use of the app.

135

### 136 **Downloads and active use of the SwissCovid app**

137 To measure the number of app downloads and active apps, reliable monitoring is already  
138 in place (Figure 1, Box 1). By August 31, 2020, the SwissCovid app has been downloaded 2.31  
139 million times, and the number of active apps per day has been estimated at 1.59 million

140 (Figure 2A). The number of active users corresponds to 18.5% of the Swiss population (8.6  
141 million).

142  
143 During the study period, the FOPH reported 8,522 confirmed SARS-CoV-2 cases. During  
144 the same time period, the FOPH issued 1,593 (18.7% of confirmed cases) Covidcodes and  
145 1,054 (12.4% of confirmed cases, 66.2% of issued Covidcodes) of these Covidcodes were  
146 entered in the app by the users (Figure 1, Box 2; Figure 2B). While the decentralized nature  
147 makes it impossible to know how many notifications were subsequently generated, the  
148 entered Covidcodes triggered 874 phone calls to the SwissCovid hotline, thus providing  
149 evidence for actions undertaken by notified contacts (Figure 1, Box 3; Figure 2B).

150  
151 The Zurich SARS-CoV-2 Cohort provides additional evidence for SwissCovid app use and  
152 notification response among RT-PCR-confirmed cases and their close contacts. From  
153 August 7, 2020 to August 28, 2020, this study recruited 96 cases out of 1227 (7.8%)  
154 individuals tested RT-PCR-positive in Zurich during the same period. Of the 96 recruited  
155 positive cases, 53 (54%) reported that they had used the SwissCovid app, of whom 48  
156 entered the Covidcode in the app. Also, in a sample of 82 exposed close contacts of RT-  
157 PCR-confirmed cases from the same cohort, 60 of the 82 close contacts (73%) reported  
158 that they had used the SwissCovid app. Of those 60 app users, 23 (38%) received an app  
159 notification in addition to being identified by the classic contact tracing system.

160

161 **Evidence for app users responding to notifications**

162 Routine public health surveillance data suggest that notified contacts seek SARS-CoV-2  
163 testing (Figure 1, Box 4). Information on reason for RT-PCR testing has been collected  
164 during the study period and was available for 5,491 (64%) of the 8,522 confirmed cases.  
165 Among these, 4,426 reported symptoms compatible with COVID-19, 331 reported outbreak  
166 investigation, and 26 reported the SwissCovid app as the reason for the test (Figure 1, Box  
167 5). As the information on the reason for the test was only complete for 64% of confirmed  
168 cases, the total number of cases that were tested because of the notification by the app is  
169 likely higher. To estimate this number, we applied multiple imputation by chained equation  
170 [18], accounting for the effect of age and sex on the probability of missing information. This  
171 approach yielded a total of 37 cases (95% CI: 29-48) reporting the SwissCovid app as the  
172 reason for testing over the period considered. These cases displayed a slightly younger age  
173 distribution but a similar sex distribution compared to cases reporting another reason for  
174 testing (Figure 2C).

175

### 176 **Effectiveness of the SwissCovid app**

177 A key measure to quantify the effectiveness of contact tracing at identifying SARS-CoV-2  
178 infections is the number of positive contacts per index case. This number depends on  
179 several factors, such as the number of contacts traced per index case and the overall  
180 dynamics of the epidemic. Two large studies of classic contact tracing for SARS-CoV-2  
181 found 23 secondary cases in contacts of 100 index cases (0.23, 95% CI: 0.15-0.32) in Taiwan  
182 [19] and 2,169 positive cases in contacts of 5,706 index cases (0.38, 95% CI: 0.37-0.39) in  
183 South Korea [20]. To compare the effectiveness of the SwissCovid app to these classic  
184 contact tracing studies, we estimated the number of notified positive contacts using the



185 app per index case who entered a Covidcode using the formula  $\epsilon = n / (c\mu)$ , where  $n=37$  (95%  
186 CI: 29-48) is the imputed total number of confirmed cases that reported the SwissCovid  
187 app as the reason for the test,  $c=1,054$  is the number of entered Covidcodes, and  $\mu=18.5\%$   
188 is the proportion of the Swiss population that are active users of the app. Hence, the term  
189  $c\mu$  corresponds to the number of index cases entering Covidcodes scaled by the probability  
190 that their contacts use the SwissCovid app assuming a homogeneous distribution of the  
191 app coverage. We obtained  $\epsilon=0.19$  (95% CI: 0.15-0.25), which is in a similar range to the  
192 numbers from the classic contact tracing studies.

193

194 Several factors could affect the estimated effectiveness of the SwissCovid app. Due to  
195 clustering of app users, the calculated  $\epsilon$  could represent an upper estimate as the uptake  
196 of the SwissCovid app in contacts of app users might be higher than the average uptake in  
197 the Swiss population. Assuming  $\mu=73\%$ , which is the uptake of the app in contacts of RT-  
198 PCR-confirmed cases from the Zurich SARS-CoV-2 Cohort, we obtained  $\epsilon=0.05$  (95% CI:  
199 0.04-0.06) as a lower estimate which would still represent a respectable effectiveness of  
200 the app at identifying SARS-CoV-2 infections in contacts of index cases. However, a  
201 number of factors can also contribute to an underestimate of  $\epsilon$ . First, confirmed cases  
202 might only report the presence of symptoms as the reason for the test even though they  
203 were notified by the app. Second, due to the decentralized and voluntary nature of  
204 SwissCovid, there may have been more notified contacts that got infected and self-isolated  
205 following the notification, but did not get tested, and are thus missing from the analysis.  
206 Third, reported numbers of RT-PCR-confirmed cases using the app for the study period  
207 might be slightly higher in reality due to time delays in reporting.

208

209 Reliable, continuous monitoring of app effectiveness indicators is still being improved. Also,  
210 citizen reports on social media (e.g. Twitter) have suggested multi-day delays in receiving  
211 Covidcodes following positive test results in some instances. Along the same lines, during  
212 the study period, only about two thirds of issued Covidcodes have been entered and  
213 triggered notifications (Figure 2B). Efforts to streamline procedures and app user  
214 interactions with local health authorities - i.e. a direct referral of notified hotline callers to  
215 the responsible local authorities - are underway. Our findings illustrate that digital contact  
216 tracing can be effective even with low uptake, as suggested by mathematical modeling [21].  
217 Because app coverage affects both the number of index cases and their contacts, the total  
218 number of SARS-CoV-2 infections that could be identified through digital contact tracing  
219 scales with the square of the coverage and could substantially increase with higher uptake  
220 (Figure 2D).

221

222 In conclusion, based on the data collected during the initial deployment of the SwissCovid  
223 app, we argue that voluntary digital contact tracing can show similar effectiveness at  
224 identifying infected partners of index cases as classic contact tracing, provided that both  
225 the index case and the exposed contacts use the app. As the effectiveness of digital contact  
226 tracing crucially depends on a strong embedding into an efficient testing and contact  
227 tracing infrastructure on the ground, apps like SwissCovid represent a helpful  
228 complementary tool for controlling the spread of SARS-CoV-2. The strength of evidence  
229 for app effectiveness as summarized in Figure 1 illustrates that most indicators have  
230 reached at least a “proof-of-principle” stage. That is, the outcome of interest was observed

231 independently in two data sources in all important key indicators. There is, however, still  
232 room for improvement. Upcoming improvements in the EN API by Apple and Google will  
233 increase the precision in determining risk, and reduce delay in communicating it to users.  
234 International interoperability exchanges, planned for October 2020, will increase the  
235 effectiveness of the app, in particular in the countries bordering Switzerland. Speed is  
236 essential to the effectiveness of TTIQ strategies [4,5]. Reducing the time to quarantine for  
237 contacts, as a result of digital contact tracing, should provide an additional, important  
238 benefit to COVID-19 mitigation efforts.

239

#### 240 **Acknowledgement**

241 The authors would like to acknowledge the Swiss Federal Office of Public Health, the  
242 Federal Statistical Office, and the Federal Office of Information Technology, Systems and  
243 Telecommunication for their collaborative contributions which were essential for the  
244 development, deployment, and assessment of SwissCovid. We thank the epidemiology unit  
245 at the Federal Office of Public Health for the contributions in providing data and  
246 commenting on the results and conclusions. We would also like to thank the Cantonal  
247 Health Directorate Zurich for their support and collaboration in the conduct of the Zurich  
248 SARS-CoV-2 Cohort, as well as the Swiss School of Public Health and the Corona Immunitas  
249 program for contributing to the study with their structure and services.

250

#### 251 **Funding**

252 MS received funding from the European Union's Horizon 2020 research and innovation  
253 programme - project "Versatile emerging infectious disease observatory - forecasting,

254 nowcasting and tracking in a changing world (VEO)” (No. 874735). CA received funding from  
255 the European Union’s Horizon 2020 research and innovation programme - project EpiPose  
256 (No 101003688) and the Swiss National Science Foundation (grant 196046). NL received  
257 funding from the European Union’s Horizon 2020 research and innovation programme -  
258 project EpiPose (No 101003688) and the Swiss National Science Foundation (grant 176233).  
259 TB, DM and VvW received funding from the Cantonal Health Directorate Zurich, the  
260 Federal Office of Public Health, the University of Zurich Foundation Pandemic Fund and  
261 the Fondation Les Mûrons for the Zurich SARS-CoV-2 Cohort. EPFL is receiving base  
262 funding for both research and development of SwissCovid from the Fondation Botnar.

263

**FIGURES**

264

|                                                                           | <b>Early signal</b><br>(observed in single data source) | <b>Proof of principle</b><br>(observed in two independent data sources) | <b>Reliable, valid quantification</b><br>(regular monitoring in place) | <b>Target reached</b><br>(targets clearly defined and met by indicators) |
|---------------------------------------------------------------------------|---------------------------------------------------------|-------------------------------------------------------------------------|------------------------------------------------------------------------|--------------------------------------------------------------------------|
| 1) Apps are downloaded and active                                         |                                                         |                                                                         | <b>Box 1:</b> Regular monitoring through Federal Statistical Office    |                                                                          |
| 2) Covidcodes are issued upon PCR-positive test and entered               |                                                         |                                                                         | <b>Box 2:</b> Regular monitoring through Federal Statistical Office    |                                                                          |
| 3) Notifications are received by exposed persons                          |                                                         | <b>Box 3:</b> Reports from two independent population surveys           |                                                                        |                                                                          |
| 4) Notifications lead to actions in exposed persons (testing, quarantine) |                                                         | <b>Box 4:</b> Mandatory reporting upon PCR+ test                        |                                                                        |                                                                          |
| 5) Actions lead to prevention of secondary transmission                   |                                                         | <b>Box 5:</b> Mandatory reporting upon PCR+ test; contact tracing study |                                                                        |                                                                          |


  
 Accumulation of evidence

265

266

267 **Figure 1: Quality of evidence for SwissCovid app effectiveness.** Row labels: Necessary  
 268 technical, procedural and behavioral conditions for digital contact tracing to be effective.  
 269 Columns: Milestones in evidence accumulation. Green boxes indicate available data  
 270 sources for evidence assessments; quantitative information related to green boxes are  
 271 provided in the main text.

272

273

274

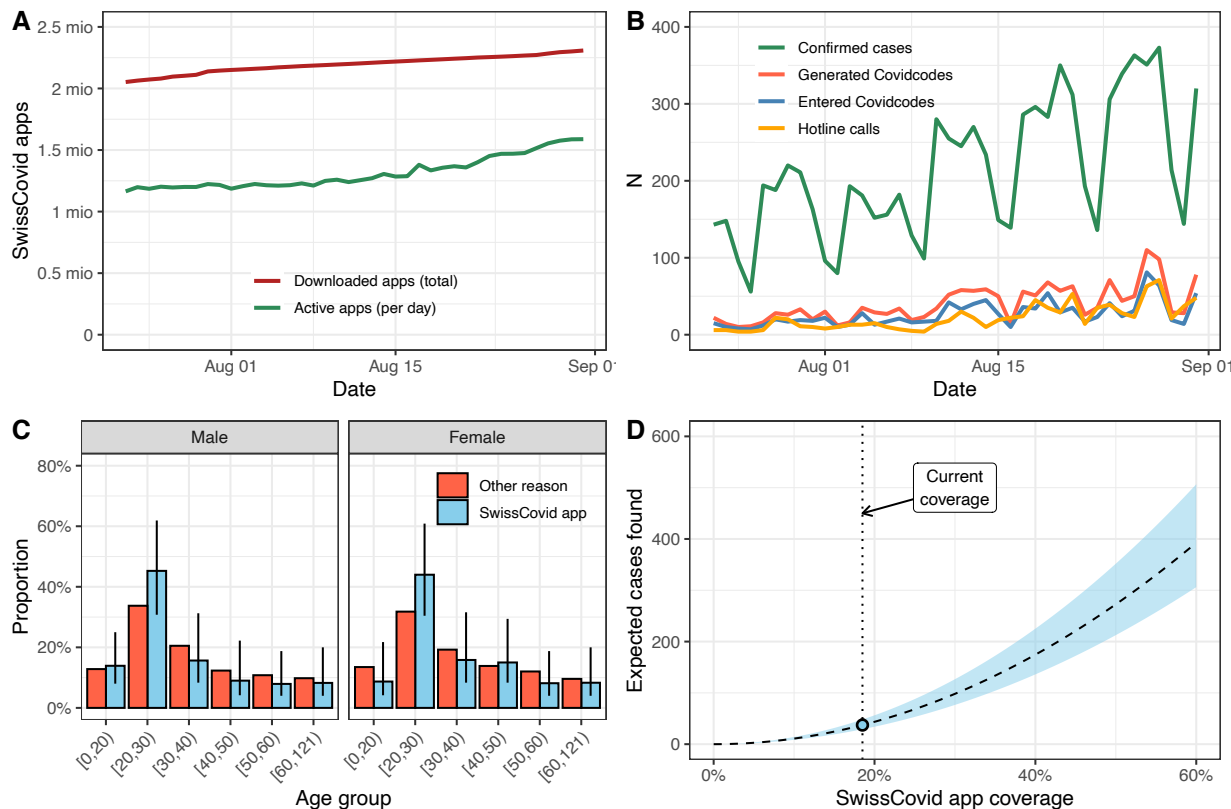

275

276

277 **Figure 2: SwissCovid app measures.** (A) Total number of downloaded apps and daily

278 number of active apps. (B) Daily numbers of confirmed SARS-CoV-2 cases, generated

279 Covidcodes, entered Covidcodes and hotline calls. (C) Age distribution of cases stratified

280 by the reason for RT-PCR test (either SwissCovid app or other reason). (D) Expected

281 number of RT-PCR-confirmed cases that were tested because of a notification by the app

282 as a function of hypothetical app coverage during the study period. Error bars and the blue

283 shaded area correspond to 95% confidence intervals.

284

285 **REFERENCES**

286

287

288

289 1. World Health Organization. Coronavirus disease (COVID-19) - Weekly Epidemiological Update.

290 [cited 4 Sep 2020]. Available: [https://www.who.int/docs/default-](https://www.who.int/docs/default-source/coronaviruse/situation-reports/20200831-weekly-epi-update-3.pdf?sfvrsn=d7032a2a_4)

291 [source/coronaviruse/situation-reports/20200831-weekly-epi-update-3.pdf?sfvrsn=d7032a2a\\_4](https://www.who.int/docs/default-source/coronaviruse/situation-reports/20200831-weekly-epi-update-3.pdf?sfvrsn=d7032a2a_4)

292

293 2. Salathé M, Althaus CL, Neher R, Stringhini S, Hodcroft E, Fellay J, et al. COVID-19 epidemic in

294 Switzerland: on the importance of testing, contact tracing and isolation. *Swiss Medical Weekly*.

295 2020. doi:<https://doi.org/10.4414/smw.2020.20225>

296

297 3. Aleta A, Martin-Corral D, Piontti AP y, Ajelli M, Litvinova M, Chinazzi M, et al. Modeling the

298 impact of social distancing, testing, contact tracing and household quarantine on second-wave

299 scenarios of the COVID-19 epidemic. *Medrxiv*. 2020; 2020.05.06.20092841.

300 doi:[10.1101/2020.05.06.20092841](https://doi.org/10.1101/2020.05.06.20092841)

301

302 4. Kucharski AJ, Klepac P, Conlan AJK, Kissler SM, Tang ML, Fry H, et al. Effectiveness of isolation,

303 testing, contact tracing, and physical distancing on reducing transmission of SARS-CoV-2 in

304 different settings: a mathematical modelling study. *Lancet Infect Dis*. 2020. doi:[10.1016/s1473-](https://doi.org/10.1016/s1473-3099(20)30457-6)

305 [3099\(20\)30457-6](https://doi.org/10.1016/s1473-3099(20)30457-6)

306

307 5. Ferretti L, Wymant C, Kendall M, Zhao L, Nurtay A, Abeler-Dörner L, et al. Quantifying SARS-

308 CoV-2 transmission suggests epidemic control with digital contact tracing. *Science*. 2020;368:

309 eabb6936. doi:[10.1126/science.abb6936](https://doi.org/10.1126/science.abb6936)

- 310 6. Troncoso C, Payer M, Hubaux J-P, Salathé M, Larus J, Bugnion E, et al. Decentralized Privacy-  
311 Preserving Proximity Tracing. arxiv. 2020. Available: <https://arxiv.org/abs/2005.12273>  
312
- 313 7. Wyl V von, Bonhoeffer S, Bugnion E, Salathé M, Stadler T, Troncoso C, et al. A research agenda  
314 for digital proximity tracing apps. Swiss Medical Weekly. 2020.  
315 doi:<https://doi.org/10.4414/smw.2020.20324>  
316
- 317 8. World Health Organization. Ethical considerations to guide the use of digital proximity tracking  
318 technologies for COVID-19 contact tracing. [cited 4 Sep 2020]. Available:  
319 [https://www.who.int/publications/i/item/WHO-2019-nCoV-Ethics\\_Contact\\_tracing\\_apps-](https://www.who.int/publications/i/item/WHO-2019-nCoV-Ethics_Contact_tracing_apps-2020.1)  
320 [2020.1](https://www.who.int/publications/i/item/WHO-2019-nCoV-Ethics_Contact_tracing_apps-2020.1)  
321
- 322 9. Gasser U, Ienca M, Scheibner J, Sleigh J, Vayena E. Digital tools against COVID-19: taxonomy,  
323 ethical challenges, and navigation aid. Lancet Digital Heal. 2020;2: e425–e434. doi:10.1016/s2589-  
324 7500(20)30137-0  
325
- 326 10. Telecommunication SFO of ITS and. SwissCovid Exposure Score Calculation. [cited 4 Sep 2020].  
327 Available: [https://github.com/admin-ch/PT-System-Documents/blob/master/SwissCovid-](https://github.com/admin-ch/PT-System-Documents/blob/master/SwissCovid-ExposureScore.pdf)  
328 [ExposureScore.pdf](https://github.com/admin-ch/PT-System-Documents/blob/master/SwissCovid-ExposureScore.pdf)  
329
- 330 11. World Health Organization. Contact tracing in the context of COVID-19. [cited 4 Sep 2020].  
331 Available: [https://www.who.int/publications/i/item/contact-tracing-in-the-context-of-covid-](https://www.who.int/publications/i/item/contact-tracing-in-the-context-of-covid-19)  
332 [19](https://www.who.int/publications/i/item/contact-tracing-in-the-context-of-covid-19)  
333



- 334 12. Wyl V von, Hoeglenger M, Sieber C, Kaufmann M, Moser A, Serra-Burriel M, et al. Are COVID-19  
335 proximity tracing apps working under real-world conditions? Indicator development and  
336 assessment of drivers for app (non-)use. medRxiv. 2020. doi:10.1101/2020.08.29.20184382  
337
- 338 13. Swiss Federal Office of Statistics. Calculation methods for estimating the number of active  
339 SwissCovid apps. [cited 4 Sep 2020]. Available:  
340 <https://www.experimental.bfs.admin.ch/bfsstatic/dam/assets/13667538/master>  
341
- 342 14. Swiss Federal Office of Statistics. SwissCovid App Monitoring. [cited 4 Sep 2020]. Available:  
343 [https://www.experimental.bfs.admin.ch/expstat/en/home/innovative-methods/swisscovid-](https://www.experimental.bfs.admin.ch/expstat/en/home/innovative-methods/swisscovid-app-monitoring.html)  
344 [app-monitoring.html](https://www.experimental.bfs.admin.ch/expstat/en/home/innovative-methods/swisscovid-app-monitoring.html)  
345
- 346 15. Corona Immunitas. [cited 4 Sep 2020]. Available: <https://www.corona-immunitas.ch/program>  
347
- 348 16. Stringhini S, Wisniak A, Piumatti G, Azman AS, Lauer SA, Baysson H, et al. Seroprevalence of  
349 anti-SARS-CoV-2 IgG antibodies in Geneva, Switzerland (SEROCoV-POP): a population-based  
350 study. Lancet. 2020;396: 313–319. doi:10.1016/s0140-6736(20)31304-0  
351
- 352 17. Zurich Coronavirus Cohort: an observational study to determine long-term clinical outcomes  
353 and immune responses after coronavirus infection (COVID-19), assess the influence of virus  
354 genetics, and examine the spread of the coronavirus in the population of the Canton of Zurich,  
355 Switzerland. [cited 4 Sep 2020]. Available: <http://www.isrctn.com/ISRCTN14990068>  
356
- 357 18. White IR, Royston P, Wood AM. Multiple imputation using chained equations: Issues and  
358 guidance for practice. Stat Med. 2011;30: 377–399. doi:10.1002/sim.4067

359

360 19. Cheng H-Y, Jian S-W, Liu D-P, Ng T-C, Huang W-T, Lin H-H, et al. Contact Tracing Assessment  
361 of COVID-19 Transmission Dynamics in Taiwan and Risk at Different Exposure Periods Before and  
362 After Symptom Onset. *Jama Intern Med.* 2020;180. doi:10.1001/jamainternmed.2020.2020

363

364 20. Park YJ, Choe YJ, Park O, Park SY, Kim Y-M, Kim J, et al. Contact Tracing during Coronavirus  
365 Disease Outbreak, South Korea, 2020. *Emerging Infectious Diseases.* 2020. doi:DOI:  
366 10.3201/eid2610.201315

367

368 21. Abueg M, Hinch R, Wu N, Liu L, Probert WJM, Wu A, et al. Modeling the combined effect of  
369 digital exposure notification and non-pharmaceutical interventions on the COVID-19 epidemic in  
370 Washington state. *medRxiv.* 2020. doi:10.1101/2020.08.29.20184135

371

372
